1 **Selection for feed efficiency elicits different postprandial plasma metabolite**  
2 **profiles in response to poor hygiene of housing conditions in growing pigs**

3 Alícia Zem Fraga<sup>1¶</sup>, Isabelle Louveau<sup>2¶</sup>, Paulo Henrique Reis Furtado Campos<sup>3&</sup>,  
4 Luciano Hauschild<sup>1&</sup>, Nathalie Le Floch<sup>h2\*</sup>

5

6 <sup>1</sup> Department of Animal Science, São Paulo State University (Unesp), School of  
7 Agricultural and Veterinarian Sciences, Jaboticabal, São Paulo, Brazil

8 <sup>2</sup> PEGASE, INRAE, Institut Agro, Saint Gilles, France

9 <sup>3</sup> Department of Animal Science, Universidade Federal de Viçosa, Viçosa, Minas  
10 Gerais, Brazil

11

12 \*Corresponding author:

13 Email: [nathalie.lefloch@inrae.fr](mailto:nathalie.lefloch@inrae.fr)

14

15 <sup>¶</sup>These authors contributed equally to this work.

16 <sup>&</sup>These authors also contributed equally to this work.

## 17 **Abstract**

18 Selection for residual feed intake (RFI), a measure of feed efficiency, may affect the  
19 ability of pigs to adapt their metabolism in response to poor environmental conditions.  
20 This study was conducted to compare postprandial plasma concentrations of insulin,  
21 energy related metabolites, and amino acids measured after a 6-week challenge  
22 consisting of exposure to good or poor hygiene of housing conditions of 24 growing  
23 pigs divergently selected for low-RFI (LRFI) and high-RFI (HRFI). Blood indicators of  
24 immune responses were assessed from samples collected before (week 0 or W0),  
25 and 3 (W3) and 6 weeks (W6) after pigs transfer to their respective housing hygiene  
26 conditions. Plasma haptoglobin concentrations and blood neutrophil granulocyte  
27 numbers were greater in poor than in good conditions at W3. Plasma concentrations  
28 of total immunoglobulin G were greater ( $p = 0.04$ ) in poor than in good hygiene  
29 conditions at W6. At W6, pigs were fitted with an intravenous catheter for serial blood  
30 samplings. Low-RFI pigs had greater insulin ( $p < 0.001$ ) and lower triglyceride ( $p =$   
31  $0.04$ ) average plasma concentrations than HRFI pigs in both conditions. In poor  
32 hygiene conditions, the peaks of insulin and glucose occurred earlier and that of  
33 insulin was greater in LRFI than in HRFI pigs. Irrespective of genetic line, average  
34 plasma concentrations of histidine, isoleucine, leucine, methionine, threonine, valine,  
35 and alanine were greater in poor compared with good conditions. Only HRFI pigs had  
36 greater lysine, asparagine, proline, and tyrosine plasma concentrations in poor than  
37 in good hygiene conditions. Conversely, arginine, tryptophan, proline, and tyrosine  
38 plasma concentrations were lower only for LRFI pigs housed in poor hygiene  
39 conditions. The impact of poor hygiene of housing conditions on insulin, triglycerides,  
40 and AA profiles differed between RFI lines. More specifically, our results suggest

41 that, contrary to HRFI, LRFI pigs increased or maintained their utilization of Trp, Arg,  
42 and Lys when housed in poor hygiene conditions. This difference may contribute to  
43 the better capacity of LRFI to cope with the poor hygiene of housing conditions.

## 44 **Introduction**

45 Selection of pigs for residual feed intake (RFI) has been used to improve feed  
46 efficiency. Briefly, for a similar production level, high-RFI (HRFI) pigs eat more than  
47 predicted based on average requirements for growth and maintenance and therefore  
48 are less efficient than low-RFI (LRFI) pigs [1]. Difference in feed efficiency between  
49 genetic lines is explained by physical activity [2], heat production [3], and metabolism  
50 [4]. Genetic selection for RFI results in changes in the partition of nutrients between  
51 maintenance and growth [5]. Differences in nutrient partitioning alter pig ability to  
52 allocate nutrients for stress and immune responses when facing environmental  
53 challenges [6]. In commercial farms, pigs are often exposed to stressful situations like  
54 weaning, mixing, high stocking density, transport, and poor hygiene conditions  
55 resulting in immune system hyper-activation. In turn, immune hyper-activation,  
56 including inflammation, result in changes in nutrient metabolism to support the  
57 immune responses, which therefore reduce nutrient availability for growth [7].

58 The better ability of LRFI compared with HRFI growing pigs to cope with an immune  
59 challenge caused by poor hygiene of housing conditions was previously reported [8].  
60 We hypothesized that this difference in coping ability between RFI pigs may involve  
61 changes in their metabolism after a 6-week exposure to contrasted hygiene of  
62 housing conditions. To evaluate this metabolic response, we analysed the patterns of  
63 plasma postprandial concentrations of insulin, nitrogen- and energy-related  
64 metabolites as it has been shown previously that they reflect changes in the use of

65 nutrients for anabolic and catabolic processes. The same methodology was recently  
66 reported to describe the metabolic status of growing pigs in response to an  
67 inflammatory challenge and high ambient temperature [9] or to compare castrated  
68 and entire male pigs [10]. Therefore, the present study was carried out to compare, in  
69 LRFI and HRFI pigs, the effects of poor hygiene of housing conditions on pre- and  
70 postprandial plasma concentrations of insulin, energy-related metabolites, and free  
71 amino acids (AA).

## 72 **Material and methods**

73 The experiment was conducted at INRAE UE3P (Saint-Gilles, France) in accordance  
74 with the ethical standards of the European Community (Directive 2010/63/EU), and  
75 was approved by the Regional ethical committee (CREEA number 07).

## 76 **Animals, Diets, and Experimental Design**

77 The experiment was conducted on a subset of 24 Large-White pigs from a larger  
78 study (n = 160 pigs) previously described [8]. Animals with representative body  
79 weight of each experimental group were selected at 12 weeks of age. Selected pigs  
80 were fed, housed, and submitted to the same experimental procedures as the whole  
81 set of pigs, before being involved in the serial blood sampling 6 weeks later.

82 Pigs originated from the 8th generation of a selection program for divergent RFI  
83 conducted at INRAE. Briefly, the lines were established using the RFI selection  
84 criterion between 35 and 95 kg body weight (BW), calculated as:  $RFI = ADFI - (1.24$   
85  $\times ADG) - (31.9 \times BFT)$ , where ADFI was the average daily feed intake (g/day), ADG  
86 the average daily gain (g/day) and BFT was the backfat thickness (mm) at 95 kg [11].

87 The study was performed as a 2 × 2 factorial design including four experimental  
88 groups: HRFI and LRFI pigs housed in good hygiene conditions (good-HRFI, good-  
89 LRFI); and HRFI and LRFI pigs housed in poor hygiene conditions (poor-HRFI, poor-  
90 LRFI). Briefly, poor hygiene conditions consisted of no cleaning nor sanitation of the  
91 room after the previous occupation by non-experimental pigs [8]. In contrast, good  
92 housing conditions included room cleaning, disinfection, and adoption of strict  
93 biosecurity precautions.

94 According to their allocation, pigs were placed in one of the two experimental rooms  
95 (good or poor hygiene conditions) for 6 weeks. In each room, pigs were housed in  
96 individual concrete floor pens (85 × 265 cm) equipped with a feed dispenser and a  
97 nipple drinker. Pigs had free access to water and were fed *ad libitum* a standard diet  
98 composed of wheat 32.2%, barley 30%, corn 15%, soya bean 7%, and bran 5%, and  
99 formulated to meet or exceed the nutritional requirement of growing pigs (9.47 MJ of  
100 net energy/kg, starch 44.2%; fat 3.1%; crude protein 15.3% and 8.3 g of standardized  
101 digestible lysine (Lys), Lys/kg). Lysine, threonine (Thr), methionine (Met), and  
102 tryptophan (Trp) were added as free synthetic AA. After 6 weeks, the 24 selected  
103 pigs (n = 6 per experimental group) were fitted with an intravenous ear catheter  
104 following a minimally invasive procedure. Briefly, after an overnight fast, pigs were  
105 premedicated with 15 mg/kg of ketamine injected intramuscularly (Imalgène 1000,  
106 Merial, Lyon, France) and were then anesthetized by inhalation of sevoflurane  
107 (Sevoflurane, Baxter, Maurepas, France) using a facemask. An intravenous catheter  
108 was inserted through a small incision on the flap of the ear. The external part of the  
109 catheter was fixed on the ear skin and a connector was added for blood samplings  
110 the day after catheter insertion. No drug was used to avoid interference with the  
111 health status of pigs.

## 112 **Blood Sample Collection**

113 For measuring blood indicators of immune responses (immunoglobulin G (IgG),  
114 haptoglobin, and number of blood neutrophil granulocytes), blood samples were  
115 collected at fasted state by jugular vein puncture at week zero (W0; before pig  
116 transfer to the respective hygiene conditions) and week three (W3), and from the  
117 intravenous ear catheter at week six (W6). Serial blood samplings were performed at  
118 W6 the day after catheter insertion. After being fasted overnight, each pig was  
119 offered 300 g of the standard diet at 08-h. This meal size was determined to ensure  
120 that all pigs eat their meal in less than 10 min [10] and corresponded to 15% of the  
121 average daily feed intake. Blood samples (6 ml) were collected from the catheter  
122 before the meal delivery (fasted state; t<sub>0</sub>), and then at 15, 30, 45, 60, 75, 90, 105,  
123 120, 150, 180, 210, and 240 min after the meal delivery. Blood samples were  
124 collected on ethylenediaminetetraacetic acid (EDTA) tubes for insulin, glucose, free  
125 fatty acid (FFA), triglyceride, and urea measurements; and on heparinized tubes for  
126 AA analyses. Samples were immediately placed on ice, except for EDTA tubes used  
127 for measuring the number of blood neutrophil granulocytes, and then centrifuged  
128 (1800 × g) for 10 min at 4°C. Plasma was collected and stored at -80°C for AA, and  
129 at -20°C for other plasma parameters.

## 130 **Blood Cell and Plasma Variable Analyses**

131 The number of blood neutrophil granulocytes was measured with a haematology  
132 automated cell counter calibrated for pigs (MS9; Melet Schloesing Laboratories,  
133 Osny, France). Quantitative sandwich ELISA tests were used to quantify total IgG  
134 plasma concentrations [12]. Plasma concentrations of haptoglobin (phase

135 haptoglobin assay T801; Tridelta Development Ltd, Maynooth, Ireland), glucose (Kit  
136 Glucose RTU, ref. 61269; Biomérieux, Marcy-l'Etoile, France), and free fatty acids  
137 (Kit WAKO NEFA; Sobioda, Montbonnot-Saint-Martin, France), were analysed by an  
138 automated enzymatic method using commercial kits and a multianalyzer apparatus  
139 (Konelab 20i, ThermoFisher Scientific, Courtaboeuf, France). For plasma triglyceride  
140 and urea concentration measurements, kits were obtained from Thermo Fisher  
141 Diagnostics SAS (Asnieres-Sur-Seine, France). Plasma insulin concentrations were  
142 determined using a commercial immunoassay kit (ST AIA-PACK IRI) and the AIA-  
143 1800 device (Automated Immunoassay Analyzer; TOSOH Bioscience, Tokyo,  
144 Japan). Assay sensitivity was 0.5  $\mu\text{UI/ml}$  and the intra-assay CV was below 5%.  
145 Plasma free AA concentrations were determined by an ultra-performance liquid  
146 chromatography (UPLC) apparatus (Waters Acquity Ultra Performance LC, Waters,  
147 Milford, MA, USA) after derivatization of samples using the AccQ Tag Ultra method  
148 (MassTrak AAA; Waters, Milford, MA, USA) as previously described [4].

## 149 **Calculations and Statistical Analysis**

150 The pig was the experimental unit. Average plasma concentrations of insulin, energy  
151 metabolites, and AA were calculated from pre and postprandial concentrations.  
152 Average concentrations and concentrations at each sampling time were analysed  
153 using the linear MIXED procedure (SAS Inst. Inc., Cary, NC). The model included the  
154 genetic lines (LRFI or HRFI), housing hygiene conditions (poor or good), sampling  
155 time (time), and their interactions as fixed effects. The repeated measurements  
156 option was used with a compound symmetry covariance structure to account for  
157 animal effect over sampling time. Adjusted means were compared using the  
158 Bonferroni test. Plasma concentrations of total IgG and haptoglobin, and number of

159 neutrophil granulocytes were compared between the two hygiene conditions with a  
160 non-parametric test (Median test) using the NPAR1WAY procedure of SAS.  
161 Probabilities less than 0.05 were considered significant.

162 For indispensable AA, when an interaction between genetic line and housing hygiene  
163 conditions was significant, plasma profiles were analysed by nonlinear regression  
164 using a one-compartment model with Erlang retention times [13] in combination with  
165 a constant basal concentration. The Erlang distribution was previously described by  
166 [14]. The model used to describe the change in AA concentrations over time as an  
167 asymmetric bell-shaped curve was:

$$168 \quad \text{Amino acid concentration } C(t) = \frac{k(\lambda^n \times (t)^{n-1}) \times \exp(-\lambda \times t) + C_{\text{basal}}}{(n - 1)!}$$

169 where  $C_{\text{basal}}$  is the basal concentration,  $k$  is a scale parameter,  $\lambda$  and  $n$  are shape  
170 parameters of the Erlang distribution of residence times, and  $t$  is the time. For each  
171 AA plasma concentration curve, the shape parameter  $n$  was tested using values  
172 ranging from one to four, and the result with the lowest residual SD was retained. The  
173 model was parameterized to obtain AA concentration at  $t = 0$  ( $C_0$ ), the maximum AA  
174 concentration ( $C_{\text{max}}$ ), and the time when AA concentration is maximum ( $T_{\text{max}}$ ). To  
175 test whether the parameters of the model differed between the experimental groups,  
176 a sum of squares reduction test was used [15]. As our main objective was to  
177 compare the effects of the hygiene challenge in LRFI and HRFI pigs, this test was  
178 run to compare poor-LRFI to good-LRFI, and poor-HRFI to good-HRFI. The principle  
179 was to compare a “full model” where all parameters differ between the two  
180 experimental groups with a “reduced model”, which has common parameters. This  
181 was done for each parameter successively. An F-test was used to test if the models



182 were statistically different and a probability less than 0.05 was considered as  
183 significant.

## 184 **Results**

### 185 **General Observations**

186 One good-LRFI pig was excluded from analyses because it did not fully consume the  
187 300 g of feed during the allocated time. Performance and blood indicators of immune  
188 responses are presented in Figure 1. Pig initial and final body weights were  $26.5 \pm$   
189  $2.80$  kg and  $55.4 \pm 6.88$  kg, respectively (Fig 1A). No hygiene effect was reported for  
190 ADG from W0 to W6 (data not shown;  $p = 0.16$ ). No difference between pigs allotted  
191 to poor or good hygiene conditions were reported for any measured variables at W0  
192 ( $p > 0.05$ ). At W3, plasma haptoglobin concentrations and blood neutrophil  
193 granulocyte counts were greater in pigs housed in poor than in good hygiene  
194 conditions ( $p < 0.05$ ; Figs 1B and 1C). At W6, total IgG plasma concentrations were  
195 greater in pigs housed in poor hygiene conditions compared with pigs housed in good  
196 hygiene conditions ( $p = 0.04$ ; Fig 1D).

197 **Fig 1. Body weight [(a)] and blood indicators of immune and inflammatory**  
198 **responses [(b) Haptoglobin, (c) Neutrophil granulocytes, and (d)**  
199 **Immunoglobulin G] before 0 (W0), and 3 (W3) and 6 weeks (W6) after pigs**  
200 **transfer to good or poor hygiene conditions.**

## 201 **Plasma Concentrations of Insulin, Energy-related**

## 202 **Metabolites and Urea**

203 Average concentrations of insulin, energy-related metabolites, and urea are  
204 presented in Table 1. Plasma fasted concentrations did not differ for any measured  
205 variables (data not shown,  $p > 0.05$ ). There was a sampling time effect ( $p < 0.05$ ) for  
206 all metabolites studied. No hygiene effect and interaction between Line  $\times$  Hygiene  
207 were reported ( $p > 0.05$ ). Regardless of hygiene conditions, LRFI pigs had greater  
208 insulin ( $p < 0.001$ ) and lower average plasma concentrations of triglycerides ( $p =$   
209  $0.04$ ) than HRFI pigs.

210 **Table 1. Average plasma concentrations of insulin, energy-related metabolites,**  
211 **and urea measured in low and high residual feed intake pigs (LRFI and HRFI)**  
212 **housed in good (Good) or poor (Poor) hygiene conditions at week 6.**

|                                            | LRFI |       | HRFI  |       | SEM  | <i>p</i> -value <sup>4</sup> |      |                   |
|--------------------------------------------|------|-------|-------|-------|------|------------------------------|------|-------------------|
|                                            | Good | Poor  | Good  | Poor  |      | Line                         | Hyg  | Line $\times$ Hyg |
| No. <sup>1</sup>                           | 5    | 6     | 6     | 6     |      |                              |      |                   |
| Average plasma concentrations <sup>2</sup> |      |       |       |       |      |                              |      |                   |
| Insulin, mU/l                              | 27.8 | 29.3  | 17.3  | 15.3  | 1.87 | <0.001                       | 0.89 | 0.37              |
| Glucose, mg/l                              | 1050 | 1044  | 1011  | 1009  | 22   | 0.11                         | 0.86 | 0.93              |
| FFA <sup>3</sup> , $\mu$ mol/l             | 99.7 | 125.3 | 134.8 | 107.3 | 23.8 | 0.72                         | 0.97 | 0.28              |
| Triglycerides, mg/l                        | 274  | 262   | 343   | 321   | 30   | 0.04                         | 0.58 | 0.87              |
| Urea, mg/l                                 | 140  | 150   | 143   | 158   | 13   | 0.70                         | 0.36 | 0.86              |

213 <sup>1</sup>No. = number of animals per group.

214 <sup>2</sup>Average plasma concentrations include fasted and postprandial concentrations measured for  
215 4-h after ingestion of 300 g of feed. There was no effect of the experimental treatments on  
216 fasted concentrations for any blood variables ( $p > 0.05$ ).

217 <sup>3</sup>FFA = free fatty acids.

218 <sup>4</sup>Probability values for the effect of genetic lines (Line), hygiene conditions (Hyg), and their  
219 interaction. There was an effect of sampling time ( $p < 0.05$ ) for all variables studied. The  
220 interactions with time are presented in Fig 2.

221 The Line  $\times$  Hygiene  $\times$  Time interaction was significant for insulin, glucose, and  
222 triglycerides (Fig 2). In poor hygiene conditions only, the maximum insulin  
223 concentration occurred earlier (45 min) and was greater in LRFI compared with HRFI  
224 pigs ( $p < 0.001$ ; Fig 2A). For glucose, the peak value did not differ between lines ( $p =$   
225 0.98) but occurred earlier (30 min) in LRFI than in HRFI pigs when housed in poor  
226 conditions ( $p < 0.001$ ; Fig 2B). Regarding plasma triglyceride concentrations, the  
227 minimum concentration did not differ between the four experimental groups but  
228 occurred earlier (45 min) in HRFI pigs housed in poor conditions compared with the  
229 three other groups (75 min; Fig 2D).

230 **Fig 2. Postprandial plasma profiles of [(a)] insulin and metabolites [(b) Glucose,**  
231 **(c) Free fatty acids; FFA, (d) Triglycerides, and (e) Urea] measured in low and**  
232 **high residual feed intake pigs (LRFI and HRFI) housed in good or poor hygiene**  
233 **conditions at week 6.**

## 234 **Free Plasma AA Average Concentrations**

235 Average concentrations of plasma free AA are presented in Table 2. Except for  
236 cysteine (Cys), there was a sampling time effect ( $p < 0.05$ ) for all AA. Regardless of

237 hygiene conditions, LRFI pigs had greater Met, Thr, asparagine (Asn), Cys,  
 238 glutamine (Gln), glutamate (Glu), and glycine (Gly) ( $p < 0.05$ ), and lower histidine  
 239 (His), valine (Val), and alanine (Ala) plasma concentrations ( $p < 0.05$ ) than HRFI  
 240 pigs. Irrespective of genetic line, average plasma concentrations of His, isoleucine  
 241 (Ile), leucine (Leu), Met, Thr, Val, and Ala were greater ( $p < 0.05$ ) and Gly were lower  
 242 ( $p = 0.02$ ) in poor than in good hygiene conditions. For dispensable AA, the  
 243 interaction between Line and Hygiene was significant for aspartate (Asp), proline  
 244 (Pro), serine (Ser), and tyrosine (Tyr). Average concentrations of Asp were greater in  
 245 poor than in good conditions in HRFI pigs only ( $p < 0.001$ ). When housed in poor  
 246 housing conditions, LRFI pigs had lower and HRFI had greater plasma  
 247 concentrations of Pro ( $p < 0.05$ ) than in good conditions. Low-RFI pigs had greater  
 248 average concentrations of Ser in poor than in good conditions ( $p < 0.001$ ) whereas  
 249 average concentrations did not differ in HRFI pigs ( $p = 0.72$ ). Poor hygiene conditions  
 250 resulted in lower average Tyr concentrations in LRFI and greater in HRFI pigs  
 251 compared with good conditions ( $p < 0.001$ ). For indispensable AA, the interaction  
 252 between Line and Hygiene was significant for arginine (Arg), Lys and Trp. These  
 253 results are described in details in the following paragraph.

254 **Table 2. Average concentrations of plasma free AA (nmol/ml) measured in low**  
 255 **and high residual feed intake pigs (LRFI and HRFI) housed in good (Good) or**  
 256 **poor (Poor) hygiene conditions at week 6.**

|                                               | LRFI |      | HRFI |      | SEM | Line | $p$ -value <sup>3</sup> |          |
|-----------------------------------------------|------|------|------|------|-----|------|-------------------------|----------|
|                                               | Good | Poor | Good | Poor |     |      | Hyg                     | Line×Hyg |
| No. <sup>1</sup>                              | 5    | 6    | 6    | 6    |     |      |                         |          |
| Average plasma AA concentrations <sup>2</sup> |      |      |      |      |     |      |                         |          |

|               |                    |                     |                    |                    |    |        |        |        |
|---------------|--------------------|---------------------|--------------------|--------------------|----|--------|--------|--------|
| Arginine      | 151.5 <sup>a</sup> | 139.2 <sup>b</sup>  | 100.3 <sup>c</sup> | 99.8 <sup>c</sup>  | 8  | <0.001 | 0.09   | 0.04   |
| Histidine     | 70.3               | 69.3                | 75.8               | 82.8               | 10 | <0.001 | 0.02   | 0.05   |
| Isoleucine    | 122.2              | 135.2               | 127.6              | 140.0              | 19 | 0.12   | <0.001 | 0.08   |
| Leucine       | 174.7              | 186.6               | 177.6              | 191.3              | 12 | 0.13   | <0.001 | 0.10   |
| Lysine        | 243.8 <sup>a</sup> | 234.5 <sup>ab</sup> | 216.9 <sup>b</sup> | 246.2 <sup>a</sup> | 15 | 0.16   | 0.02   | <0.001 |
| Methionine    | 40.0               | 45.9                | 30.6               | 36.1               | 11 | <0.001 | <0.001 | 0.95   |
| Phenylalanine | 83.2               | 82.3                | 84.5               | 85.8               | 8  | 0.84   | 0.14   | 0.58   |
| Threonine     | 120.1              | 129.9               | 84.0               | 95.0               | 17 | <0.001 | <0.001 | 0.44   |
| Tryptophan    | 62.5 <sup>a</sup>  | 51.7 <sup>b</sup>   | 44.2 <sup>bc</sup> | 41.4 <sup>c</sup>  | 37 | <0.001 | <0.001 | <0.001 |
| Valine        | 250.4              | 267.8               | 260.7              | 279.9              | 15 | 0.04   | <0.001 | 0.32   |
| Alanine       | 448.3              | 496.4               | 527.0              | 564.5              | 3  | <0.001 | <0.001 | 0.39   |
| Asparagine    | 60.3               | 59.1                | 52.3               | 54.1               | 17 | <0.001 | 0.92   | 0.99   |
| Aspartate     | 18.2 <sup>a</sup>  | 18.4 <sup>a</sup>   | 13.8 <sup>c</sup>  | 15.2 <sup>b</sup>  | 5  | <0.001 | 0.16   | <0.001 |
| Cystine       | 40.4               | 41.0                | 36.9               | 38.2               | 10 | 0.04   | 0.20   | 0.66   |
| Glutamine     | 592.2              | 590.1               | 522.4              | 517.8              | 7  | <0.001 | 0.88   | 0.64   |
| Glutamate     | 207.5              | 214.5               | 157.8              | 162.4              | 6  | <0.001 | 0.53   | 0.11   |
| Glycine       | 767.2              | 733.9               | 732.0              | 713.0              | 12 | 0.01   | 0.02   | 0.55   |
| Proline       | 302.1 <sup>a</sup> | 288.6 <sup>b</sup>  | 248.5 <sup>d</sup> | 274.7 <sup>c</sup> | 14 | <0.001 | 0.06   | 0.02   |
| Serine        | 134.1 <sup>b</sup> | 141.6 <sup>a</sup>  | 125.3 <sup>b</sup> | 133.1 <sup>b</sup> | 9  | <0.001 | <0.001 | <0.001 |
| Tyrosine      | 71.0 <sup>a</sup>  | 56.9 <sup>b</sup>   | 48.6 <sup>c</sup>  | 58.9 <sup>b</sup>  | 16 | <0.001 | 0.46   | <0.001 |

257 <sup>1</sup>No. = number of animals per group.

258 <sup>2</sup>Average plasma concentrations include fasted and postprandial concentrations measured  
259 for 4-h after ingestion of 300 g of feed.

260 <sup>3</sup>Probability values for the effect of genetic lines (Line), hygiene conditions (Hyg), and their  
261 interaction. Except for cystine ( $p = 0.18$ ), there was an effect of sampling time ( $p < 0.05$ ) for  
262 all AA studied. The parameters of the model for indispensable AA whose Line×Hyg

263 interaction was significant are presented in Table 3. There was Line x Time effect for Arg,  
264 only ( $p < 0.001$ ).

265 <sup>a,b,c</sup> Within a row values with different superscripts differed ( $p < 0.05$ ).

## 266 Plasma Free Indispensable AA Postprandial Profiles

267 Average Arg concentrations were lower in poor than in good hygiene conditions in

268 LRFI pigs only ( $p = 0.04$ ; Table 3). This effect was associated with lower C0 value in

269 LRFI pigs when housed in poor hygiene conditions ( $p = 0.02$ ; Table 3 and Fig 3A).

270 Lysine average concentrations ( $p = 0.02$ ; Table 3) and Cmax ( $p < 0.001$ ; Table 3 and

271 Fig 3B) value were higher in poor conditions in HRFI pigs only. Lower Trp

272 concentrations were observed in poor hygiene conditions in LRFI pigs only ( $p <$

273  $0.001$ ; Table 3). For LRFI pigs, the values of C0, and Tmax for Trp were lower in poor

274 than in good conditions ( $p < 0.001$ ; Table 3 and Fig 3C).

275 **Table 3. Values of parameters describing the postprandial kinetics of plasma**  
276 **free arginine, lysine, and threonine in low and high residual feed intake pigs**  
277 **(LRFI and HRFI) housed in good (Good) or poor (Poor) hygiene conditions at**  
278 **week 6.**

|                               | LRFI         |             |                              | HRFI        |             |                              |
|-------------------------------|--------------|-------------|------------------------------|-------------|-------------|------------------------------|
|                               | Good         | Poor        | <i>P</i> -value <sup>3</sup> | Good        | Poor        | <i>P</i> -value <sup>3</sup> |
| No. <sup>1</sup>              | 5            | 6           |                              | 6           | 6           |                              |
| Parameter values <sup>2</sup> |              |             |                              |             |             |                              |
| Arginine                      |              |             |                              |             |             |                              |
| C0, $\mu$ M                   | 88 $\pm$ 6   | 69 $\pm$ 5  | 0.02                         | 62 $\pm$ 6  | 53 $\pm$ 6  | 0.28                         |
| Cmax, $\mu$ M                 | 193 $\pm$ 12 | 188 $\pm$ 7 | 0.62                         | 125 $\pm$ 5 | 130 $\pm$ 3 | 0.75                         |

|            |          |         |        |         |         |        |
|------------|----------|---------|--------|---------|---------|--------|
| Tmax, min  | 86 ± 4   | 81 ± 2  | 0.84   | 87 ± 5  | 96 ± 3  | 0.27   |
| Lysine     |          |         |        |         |         |        |
| C0, µM     | 126 ± 10 | 127 ± 8 | 0.98   | 145 ± 9 | 132 ± 9 | 0.34   |
| Cmax, µM   | 349 ± 2  | 329 ± 7 | 0.12   | 273 ± 5 | 315 ± 3 | <0.001 |
| Tmax, min  | 77 ± 3   | 69 ± 2  | 0.42   | 74 ± 7  | 86 ± 3  | 0.61   |
| Tryptophan |          |         |        |         |         |        |
| C0, µM     | 39 ± 2   | 27 ± 2  | <0.001 | 25 ± 2  | 22 ± 2  | 0.79   |
| Cmax, µM   | 72 ± 0   | 63 ± 4  | 0.17   | 52 ± 2  | 50 ± 7  | 0.88   |
| Tmax, min  | 87 ± 3   | 68 ± 5  | <0.001 | 91 ± 6  | 87 ± 4  | 0.29   |

279 <sup>1</sup>No. = number of animals per group.

280 <sup>2</sup>Values are means ± SD. C0: the concentration at t = 0, Cmax: the maximum  
281 concentration, Tmax: the time in minute at maximum concentration.

282 <sup>3</sup>Probability values for the effect of hygiene conditions.

283 **Fig 3. Plasma profiles of free indispensable amino acids [(a) arginine; Arg, (b)**  
284 **lysine; Lys, and (c) tryptophan; Trp] measured in low and high residual feed**  
285 **intake pigs (LRFI and HRFI) housed in good or poor hygiene conditions at**  
286 **week 6. The observed (Ob) and estimated (Es) values are presented.**

## 287 Discussion

288 This study was conducted to compare the metabolic modifications induced by poor  
289 hygiene of housing conditions in LRFI and HRFI growing pigs. Our major and original  
290 finding is that the effects of the poor hygiene challenge on the postprandial profiles of  
291 insulin and some indispensable AA differ between the two RFI lines. We discuss if

292 such differences may explain the better coping ability of LRFI pigs previously  
293 reported [8].

294 To compare metabolic changes induced by the experimental factors, we analysed the  
295 average postprandial plasma concentrations of insulin, energy and nitrogen-related  
296 metabolites, as well as the pattern of postprandial plasma indispensable AA profiles.  
297 Briefly, on the day of serial blood samplings, after being fasted overnight, all pigs  
298 received 300 g of the same feed that they consumed in less than 10 min. Thus,  
299 differences in plasma profiles were associated to differences in both digestion and  
300 postprandial metabolism induced by the experimental factors, namely the genetic  
301 line, the housing hygiene condition, and their interaction. In the current study, a  
302 model of poor hygiene of housing conditions was used to induce an immune system  
303 hyper-activation and systemic inflammation. This challenge alters health and  
304 decreases pig growth performance [8]. In the current study, the findings of greater  
305 plasma haptoglobin concentrations and blood neutrophil granulocyte counts in poor  
306 than in good hygiene conditions at W3 indicate that the model successfully induced  
307 an inflammation. Moreover, greater total IgG plasma concentrations in poor  
308 conditions at W6 show that the immune system was still overstimulated at the time of  
309 serial blood sampling. Contrary to AA, energy-related metabolites and insulin did not  
310 differ between poor and good hygiene conditions. It should be noted that in our study,  
311 insulin and energy metabolite concentrations were measured 6 weeks after the  
312 beginning of the challenge when pigs were probably recovering from inflammation as  
313 indicated by lower blood haptoglobin concentrations at W6 compared with W3.  
314 Indeed, during an inflammatory challenge, plasma glucose concentrations were  
315 restored two days after being temporarily increased in young growing pigs [4]  
316 showing the fast return to glucose homeostasis. Pigs housed in poor hygiene



317 conditions had greater concentrations of Ala, His, Met, Thr, and branched-chain AA  
318 (BCAA) than pigs housed in good conditions. Greater AA plasma concentrations may  
319 be due to a lower AA retention as muscle protein in immune challenged pigs [16]  
320 caused by an increase in protein breakdown and/or decrease in protein synthesis.  
321 Indeed, growth rate measured in the whole set of pigs was depressed after 6 weeks  
322 of housing in poor hygiene conditions and this effect was caused by the poor health  
323 status and hyper-activation of the immune system [8]. Conversely, lower Thr  
324 postprandial plasma concentrations were reported in pigs coinfecting with  
325 *Mycoplasma hyopneumoniae* and influenza virus probably to support a great demand  
326 for immunoglobulin synthesis [12]. Such a discrepancy regarding the response of Thr  
327 concentrations in our study was unexpected since the hygiene challenge increased  
328 immunoglobulin plasma concentrations but this increase was probably too moderate  
329 to impact plasma Thr concentrations. From these results, it can be suggested that  
330 inflammation and immune system hyper-activation impacted glucose metabolism  
331 more rapidly and for a shorter period than protein metabolism, as previously reported  
332 after a change in hormonal status in growing pigs [10]. Accordingly, in septic rats,  
333 plasma concentrations of tumor necrosis factor  $\alpha$  measured 1.5 hours after an  
334 experimental infection showed a strong correlation with changes in protein  
335 metabolism and body weight two weeks later [17], demonstrating that prolonged  
336 effects on nitrogen metabolism may be observed while blood indicators of  
337 inflammation are no more detectable or return to normal values.

338 Contrary to the hygiene challenge that affects metabolism and digestibility [18], the  
339 selection for RFI did not affect the digestibility of a standard low fiber feed [19]. Thus,  
340 differences in plasma profile between RFI lines are mostly explained by a difference  
341 in metabolism. Irrespective of hygiene conditions, LRFI pigs had greater average

342 plasma concentrations of insulin and lower plasma concentrations of triglycerides  
343 than HRFI pigs. In agreement with our findings, Montagne et al. [20] observed  
344 greater plasma insulin concentrations after the ingestion of a small meal and Le Naou  
345 et al. [21] reported lower plasma triglyceride concentrations measured at fed state in  
346 LRFI compared with HRFI pigs. In pigs, plasma triglycerides result from the lipolysis  
347 of lipids stored in adipose tissue. Insulin is an anabolic hormone with a potent anti-  
348 lipolytic action on adipose tissue [22]. Therefore, lower triglyceride concentrations  
349 may be partly explained by the greater insulin concentrations in plasma. Alternatively,  
350 lower plasma triglycerides levels may also be attributed to the lower body fat content  
351 of LRFI compared with HRFI pigs [23]. Moreover, the impact of the overnight fasting  
352 associated with feed restriction on the day of serial blood samplings may be greater  
353 in HRFI pigs forcing them to mobilize their body fat reserve. However, feed restriction  
354 of HRFI pigs did not affect their plasma triglyceride concentrations [21]. Poor hygiene  
355 conditions impacted differently insulin response in LRFI and HRFI. Indeed, the  
356 postprandial peak of insulin occurred earlier and was greater in LRFI compared with  
357 HRFI pigs when housed in poor hygiene conditions. Such an effect contributes to  
358 explain why LRFI pigs maintained their growth rate in poor hygiene conditions [8].  
359 Insulin is indeed the main hormone allowing the postprandial AA utilization for protein  
360 synthesis in muscle [24].

361 Plasma urea concentration did not significantly differ between the two lines. Urea is  
362 produced from the deamination of AA and, at fed state, reflects the catabolism of  
363 dietary AA that are not used for body protein synthesis and deposition. Our result is  
364 in line with a previous study showing that genetic selection for RFI did not affect  
365 nitrogen metabolism when HRFI and LRFI pigs were fed the same restricted level of  
366 feed [5]. However, differences in plasma free AA average concentrations were

367 observed between the two RFI lines. For instance, His, Val, and Ala plasma  
368 concentrations were lower in LRFI than in HRFI pigs. Lower plasma Ala  
369 concentrations at fed state were previously reported in LRFI compared with HRFI  
370 pigs [4] suggesting a lower muscular release of Ala for hepatic glucose synthesis  
371 (Cahill cycle) in LRFI pigs. This is in accordance with lower energy expenditure in  
372 LRFI than in HRFI pigs [5]. The BCAA (Ile, Leu and Val) are the major donors of the  
373 amino group for the synthesis of Ala from pyruvate in muscle [4]. In the present  
374 experiment, despite that only Val concentrations differed between the two lines, Ile  
375 and Leu plasma concentrations were numerically lower in LRFI than in HRFI pigs.  
376 Alanine synthesis in muscle and its release in the plasma in LRFI pigs may have  
377 been reduced by the decreased availability of BCAA. In the current study, Arg and  
378 Trp average and basal plasma concentrations were lower in LRFI pigs when housed  
379 in poor compared with good housing conditions whereas the challenge did not affect  
380 plasma concentrations of these two AA in HRFI pigs. Besides being proteinogenic  
381 AA, both Trp and Arg are known to be involved in immune-related metabolic  
382 pathways. During immune hyper-activation, Trp is catabolized in kynurenine by the  
383 indoleamine 2,3-dioxygenase (IDO) enzyme, a metabolic pathway involved in the  
384 regulation of immune responses [25]. Arginine is an AA serving as a precursor for the  
385 synthesis of polyamines that is massively used by rapidly dividing cells like  
386 proliferating lymphocytes [26]. It is also involved in the synthesis of creatine that has  
387 anti-oxidative and anti-inflammatory functions [27]. Lower C0 values for Trp and Arg  
388 may reflect an effect of immune activation that is independent of postprandial use of  
389 AA for muscle anabolism. Besides, for Trp, the time-related variations differed  
390 between hygiene conditions in LRFI pigs with earlier time at maximum plasma  
391 concentration (Tmax) in poor than those housed in good conditions. Such results

392 might be a consequence of faster postprandial clearance of dietary Trp for both  
393 immune responses and muscle anabolism. If genetic selection for LRFI reduces the  
394 total tract digestive capacity of pigs challenged with bacterial endotoxin [28], a  
395 significant contribution of the digestive tract to Trp postprandial utilization seems  
396 unlikely since Trp is not extensively used by the gut [29]. To summarize, lower  
397 average concentrations of Trp and Arg in LRFI pigs may result from an increased  
398 utilization of these two AA for immune purposes and may contribute to support the  
399 greater ability of LRFI pigs to cope with poor hygiene conditions and to maintain their  
400 growth rate in challenging conditions [8]. When housed in poor hygiene conditions,  
401 HRFI pigs had greater average concentrations and maximum plasma concentration  
402 (Cmax) of Lys than those housed in good conditions whereas no difference between  
403 hygiene was reported in LRFI pigs. Greater plasma Lys concentrations are probably  
404 a consequence of lower body protein synthesis and reduced efficiency of nitrogen  
405 utilization for protein retention in pigs when the immune system is overstimulated  
406 [30]. Accordingly, Chatelet et al. [8] reported that ADG of the HRFI pigs was more  
407 affected by poor hygiene conditions with a difference in ADG between poor- and  
408 good-HRFI pigs being twice the differences observed between poor- and good-LRFI  
409 pigs.

410 In conclusion, our results show that insulin, energy metabolite, and AA postprandial  
411 profiles differ between LRFI and HRFI pigs in response to poor hygiene of housing  
412 conditions. The findings that only LRFI had lower concentrations of Trp and Arg in  
413 poor hygiene of housing conditions may be associated with a greater AA utilization  
414 for supporting their coping ability and growth. Conversely, only HRFI pigs had greater  
415 concentrations of Lys in poor hygiene conditions, which is in line with the greater  
416 impact of the challenge on protein deposition. Although our results clearly showed

417 that selection for RFI modified the metabolic response to the hygiene challenge, it is  
418 not possible to determine whether selection has first modified the immune response  
419 or some metabolic pathways.

## 420 **Data reporting**

421 The data were deposited in DataINRAE repository: <https://doi.org/10.15454/U0RH9F>

## 422 **Acknowledgements**

423 The authors thank the staff of INRAE PEGASE and UE3P for their collaboration. This  
424 study was supported by the European Union's Seventh Framework Programme for  
425 Research, Technological Development and Demonstration (grant number 613574,  
426 PROHEALTH project). Alícia Zem Fraga was supported by a scholarship from the  
427 São Paulo Research Foundation (FAPESP-Brazil; grant number 2018/15559-7 and  
428 fellowship number 2018/11807-6).

## 429 **References**

- 430 1. Gilbert H, Billon Y, Brossard L, Faure J, Gatellier P, Gondret F, Labussière E, Lebret  
431 B, Lefaucheur L, Le Floc'h N, Louveau I, Merlot E, Meunier-Salaün, MC, Montagne L,  
432 Mormede P, Renaudeau D, Riquet J, Rogle-Gaillard C, van Milgen J, Vincent A, Noblet J.  
433 Review: divergent selection for residual feed intake in the growing pig. *Animal*. 2017; 11:  
434 1427–1439. doi: 10.1017/S175173111600286X.
- 435 2. Meunier-Salaün MC, Guerin C, Billon Y, Sellier P, Noblet J, Gilbert H. Divergent  
436 selection for residual feed intake in group-housed growing pigs: Characteristics of physical  
437 and behavioural activity according to line and sex. *Animal*. 2014; 8: 1898–1906. doi:  
438 10.1017/S1751731114001839.

- 439 3. Renaudeau D, Frances G, Dubois S, Gilbert H, Noblet J. Effect of thermal heat stress  
440 on energy utilization in two lines of pigs divergently selected for residual feed intake. *J Anim*  
441 *Sci.* 2013; 91: 1162–1175. doi: 10.2527/jas2012-5689.
- 442 4. Merlot E, Gilbert H, Le Floc'h N. Metabolic response to an inflammatory challenge in  
443 pigs divergently selected for residual feed intake. *J Anim Sci.* 2016; 94: 563-573. doi:  
444 10.2527/jas2015-9445.
- 445 5. Labussière E, Dubois S, Gilbert H, Thibault JN, Le Floc'h N, Noblet J, van Milgen J.  
446 Effect of inflammation stimulation on energy and nutrient utilization in piglets selected for low  
447 and high residual feed intake. *J Anim Sci.* 2015; 9: 1653-1661. doi:  
448 10.1017/S1751731115000932.
- 449 6. Knap PW. Voluntary feed intake and pig breeding. In: Tollardona D, Roura E, editors.  
450 Voluntary feed intake in pigs. Wageningen Academic Publishes, Wageningen; 2009. pp. 13–  
451 31.
- 452 7. Le Floc'h N, Wessels A, Corrent E, Wu G, Bosi P. The relevance of functional amino  
453 acids to support the health of growing pigs. *Anim Feed Sci Technol.* 2018; 245: 104–116.  
454 doi: 10.1016/j.anifeedsci.2018.09.007.
- 455 8. Chatelet A, Gondret F, Merlot E, Gilbert H, Friggens NC, Le Floc'h N. Impact of  
456 hygiene of housing conditions on performance and health of two pig genetic lines divergent  
457 for residual feed intake. *Animal.* 2018; 12: 350–358. doi: 10.1017/S1751731117001379.
- 458 9. Campos PHRF, Merlot E, Renaudeau D, Noblet J, Le Floc'h N. Postprandial insulin  
459 and nutrient concentrations in lipopolysaccharide-challenged growing pigs reared in  
460 thermoneutral and high ambient temperatures. *J Anim Sci.* 2019; 97: 3354–3368. doi:  
461 10.1093/jas/skz204.

- 462 10. Le Floc'h N, Furbeyre H, Prunier A, Louveau I. Effect of surgical or immune castration  
463 on postprandial nutrient profiles in male pigs. *Arch Anim Nutr.* 2019; 73: 255-270. doi:  
464 10.1080/1745039X.2019.1627836.
- 465 11. Gilbert H, Bidanel JP, Gruand J, Caritez JC, Billon Y, Guillouet P, Lagant H, Noblet J,  
466 Sellier P. Genetic parameters for residual feed intake in growing pigs, with emphasis on  
467 genetic relationships with carcass and meat quality traits. *J Anim Sci.* 2007; 85: 3182–3188.  
468 doi: 10.2527/jas.2006-590.
- 469 12. Le Floc'h N, Deblanc C, Cariolet R, Gautier-Bouchardon AV, Merlot E, Simon G.  
470 Effect of feed restriction on performance and postprandial nutrient metabolism in pigs co-  
471 infected with *Mycoplasma hyopneumoniae* and swine influenza virus. *PLoS ONE.* 2014;  
472 9 :e104605. doi: 10.1371/journal.pone.0104605.
- 473 13. Matis JH, Wehrly TE, Ellis WC. Some generalized stochastic compartment models for  
474 digesta flow. *Biometrics.* 1989; 45: 703–720. doi: 10.2307/2531678.
- 475 14. Gloaguen M, Le Floc'h N, Corrent E, Primot Y, van Milgen J. Providing a diet deficient  
476 in valine but with excess leucine results in a rapid decrease in feed intake and modifies the  
477 postprandial plasma amino acid and  $\alpha$ -keto acid concentrations in pigs. *J Anim Sci.* 2012; 90:  
478 3135–3142. doi: 10.2527/jas.2011-4956.
- 479 15. Ratkowsky DA, Lowry RK, McMeekin TA, Stokes AN, Chandler RE. Model for  
480 bacterial culture growth rate throughout the entire biokinetic temperature range. *J Bacteriol.*  
481 1983; 154: 1222–1226. doi: 10.1128/JB.154.3.1222-1226.1983.
- 482 16. McGilvray WD, Johnson B, Wooten H, Rakhshandeh AR, Rakhshandeh A. Immune  
483 system stimulation reduces the efficiency of whole-body protein deposition and alters muscle  
484 fiber characteristics in growing pigs. *Animals.* 2019; 9: 323-339. doi: 10.3390/ani9060323.

- 485 17. Breuillé D, Voisin L, Contrepois M, Arnal M, Rose F and Obled C. A sustained rat  
486 model for studying the long-lasting catabolic state of sepsis. *Infect Immun.* 1999; 67: 1079–  
487 1085. doi: 10.1128/IAI.67.3.1079-1085.1999.
- 488 18. Le Floc'h N, Knudsen C, Gidenne T, Montagne L, Merlot E, Zemb O. Impact of feed  
489 restriction on health, digestion and faecal microbiota of growing pigs housed in good or poor  
490 hygiene conditions. *Animal.* 2014; 8: 1632-1642. doi: 10.1017/S1751731114001608.
- 491 19. Barea R, Dubois S, Gilbert H, Sellier P, van Milgen J, Noblet J. Energy utilization in  
492 pigs selected for high and low residual feed intake. *J Anim Sci.* 2010; 88: 2062-2072. doi:  
493 10.2527/jas.2009-2395.
- 494 20. Montagne L, Loisel F, Le Naou T, Gondret F, Gilbert H, Le Gall M. Difference in short-  
495 term responses to a high fiber diet in pigs divergently selected for residual feed intake. *J*  
496 *Anim Sci.* 2014; 92: 1512–1523. doi: 10.2527/jas2013-6623.
- 497 21. Le Naou T, Le Floc'h N, Louveau I, Gilbert H, Gondret F. Metabolic changes and  
498 tissue responses to selection on residual feed intake in growing pigs. *J Anim Sci.* 2012; 90:  
499 4771–4780. doi: 10.2527/jas2012-5226.
- 500 22. Chakrabarti P, Kim JY, Singh M, Shin YK, Kim J, Kumbrink J, Wu Y, Lee MJ, Kirsch  
501 KH, Fried SK, Kandror KV. Insulin inhibits lipolysis in adipocytes via the evolutionarily  
502 conserved mTORC1-Egr1-ATGL-mediated pathway. *Mol Cell Biol.* 2013; 33: 3659–3666.  
503 doi: 10.1128/MCB.01584-12.
- 504 23. Faure J, Lefaucheur L, Bonhomme N, Ecolan P, Meteau K, Coustard SM, Kouba M,  
505 Gilbert H, Lebret B. Consequences of divergent selection for residual feed intake in pigs on  
506 muscle energy metabolism and meat quality. *Meat Sci.* 2013; 93: 37–45. doi:  
507 10.1016/j.meatsci.2012.07.006.



- 508 24. Davis TA, Burrin DG, Fiorotto ML, Reeds PJ, Jahoor F. Roles of insulin and amino  
509 acids in the regulation of protein synthesis in the neonate. *J Nutr.* 1998; 128: 347S–350S.  
510 doi: 10.1093/jn/128.2.347S.
- 511 25. Le Floc’h N, Otten W, Merlot E. Tryptophan metabolism, from nutrition to potential  
512 therapeutic applications. *Amino acids.* 2010; 41: 1195–1205. doi: 10.1007/s00726-010-0752-  
513 7.
- 514 26. Li P, Yin YL, Li D, Kim SW, Wu G. Amino acids and immune function. *Br J Nutr.* 2007;  
515 98, 237–252. doi: 10.1017/S000711450769936X.
- 516 27. Wu G, Bazer FW, Davis TA, Kim SW, Li P, Rhoads JM, Satterfield MC, Smith SB,  
517 Spencer TW, Yin Y. Arginine metabolism and nutrition in growth, health and disease. *Amino*  
518 *Acids.* 2009; 37: 153-168. doi: 10.1007/s00726-008-0210-y.
- 519 28. Rakhshandeh A, Dekkers JC, Kerr BJ, Weber TE, English J, Gabler NK. Effect of  
520 immune system stimulation and divergent selection for residual feed intake on digestive  
521 capacity of the small intestine in growing pigs. *J Anim Sci.* 2012; 90: 233-235. doi:  
522 10.2527/jas53976.
- 523 29. Cvitkovic S, Bertolo RFP, Brunton JA, Pencharz PB, Ball RO. Enteral tryptophan  
524 requirement determined by oxidation of gastrically or intravenously infused phenylalanine is  
525 not different from the parenteral requirement in neonatal piglets. *Pediat Res.* 2004; 55: 630–  
526 636. doi: 10.1203/01.PDR.0000113788.85515.7E.
- 527 30. McGilvray WD, Klein D, Wooten H, Dawson JA, Hewitt D, Rakhshandeh AR, de  
528 Lange CFM, Rakhshandeh A. Immune system stimulation induced by porcine reproductive  
529 and respiratory syndrome virus alters plasma free amino acid flux and dietary nitrogen  
530 utilization in starter pigs. *J Anim Sci.* 2019; 97: 2479–2492. doi: 10.1093/jas/skz120.

1 Fig 1.

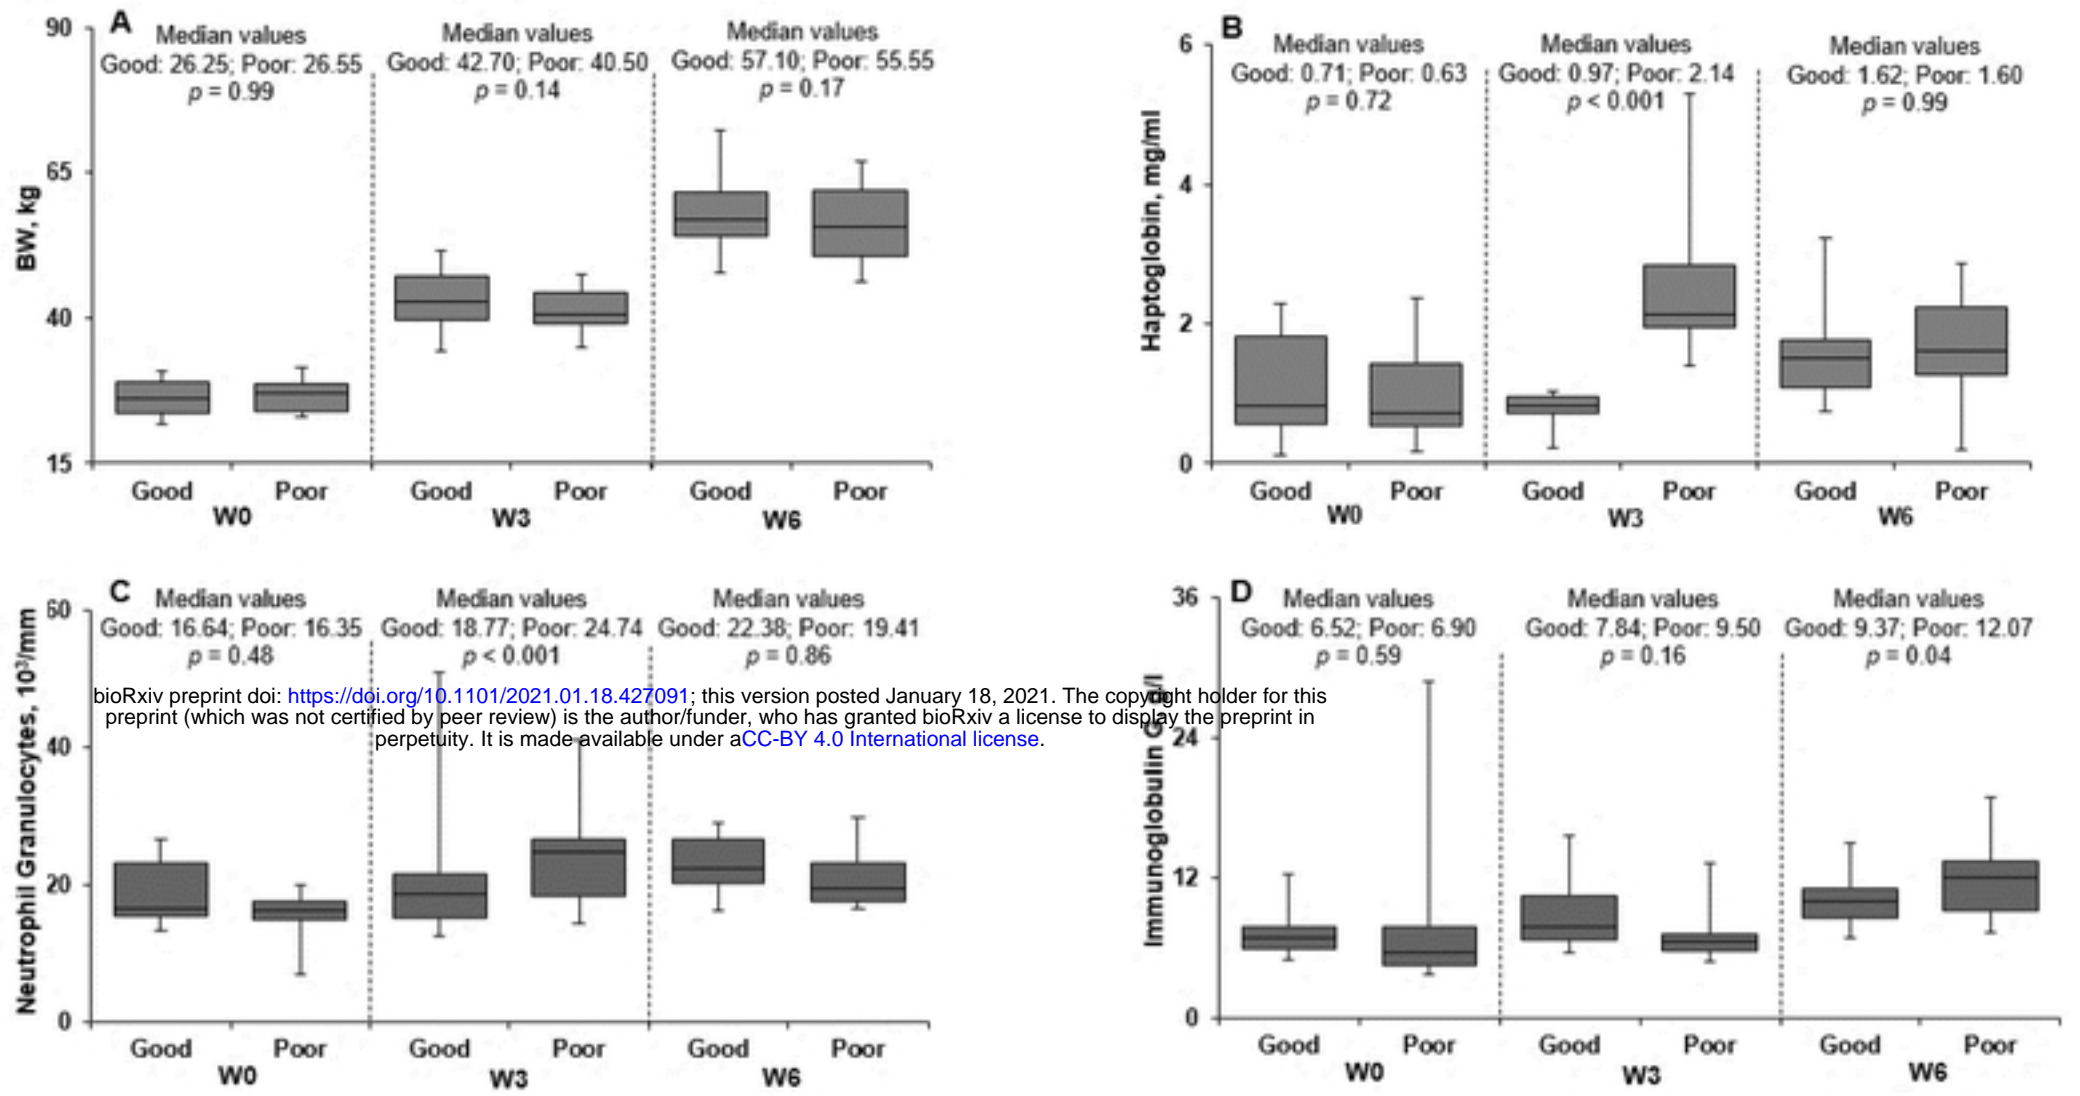

bioRxiv preprint doi: <https://doi.org/10.1101/2021.01.18.427091>; this version posted January 18, 2021. The copyright holder for this preprint (which was not certified by peer review) is the author/funder, who has granted bioRxiv a license to display the preprint in perpetuity. It is made available under aCC-BY 4.0 International license.

Figure 1

1 Fig 2.

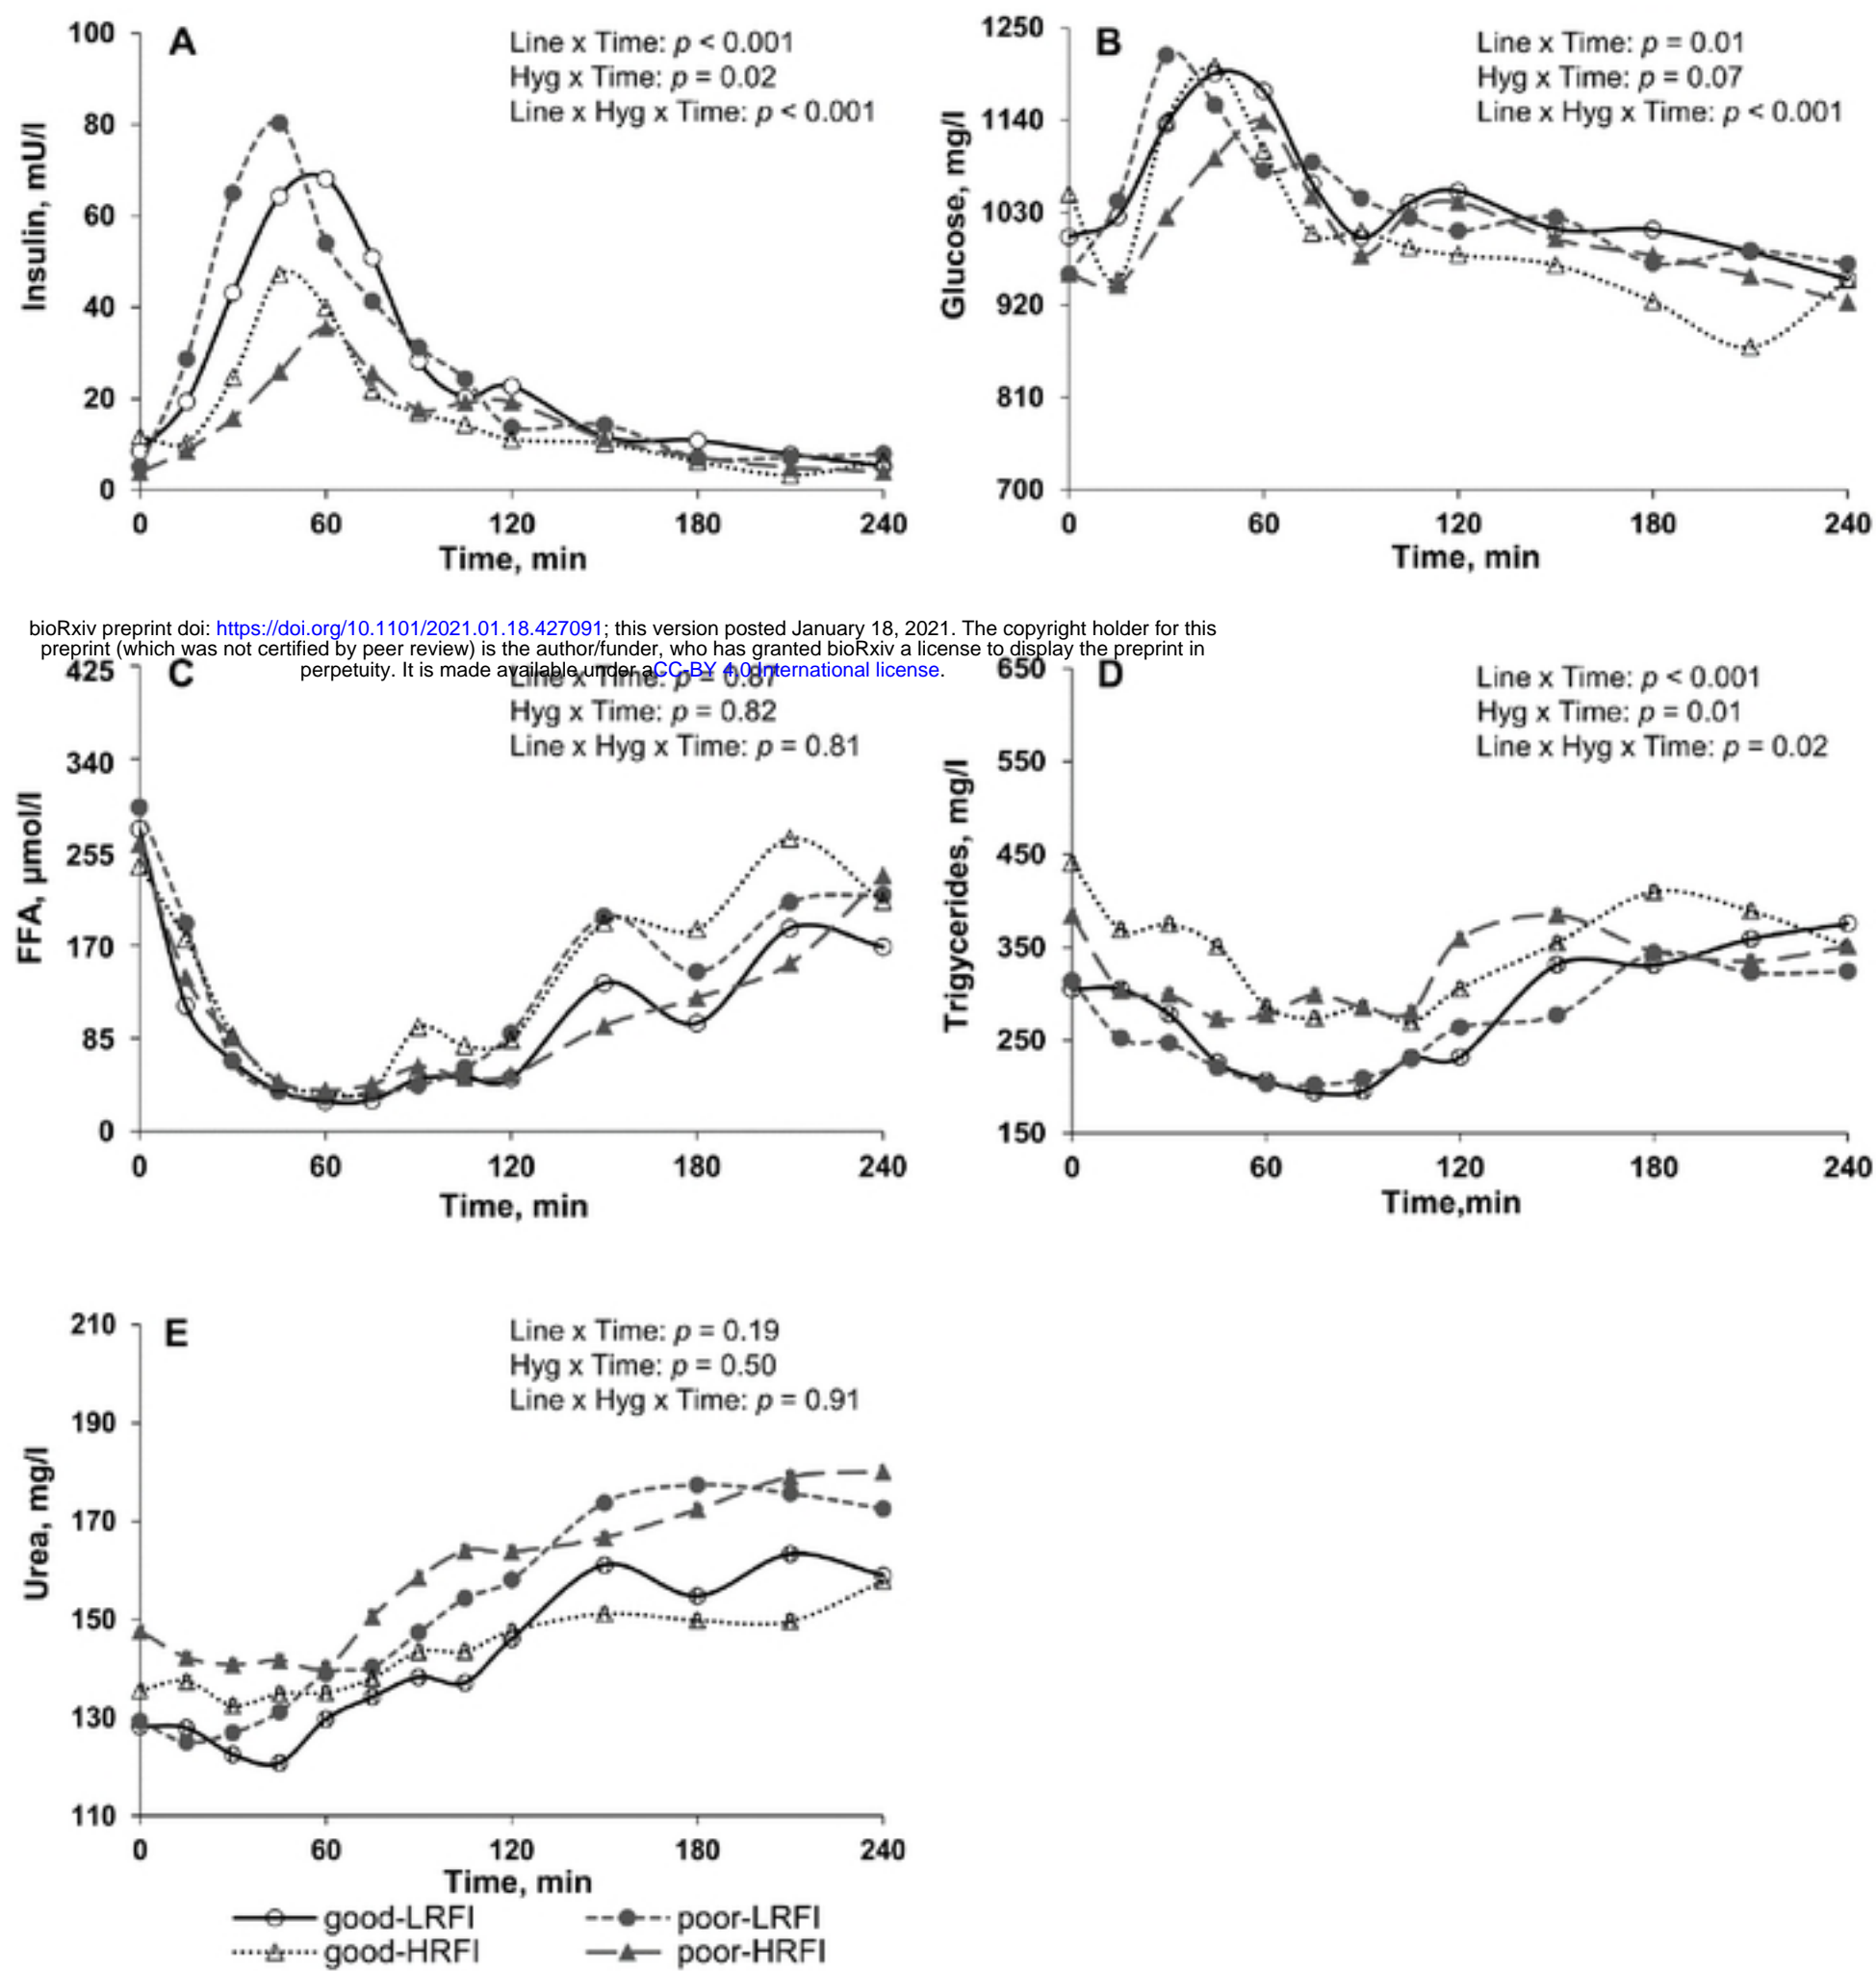

bioRxiv preprint doi: <https://doi.org/10.1101/2021.01.18.427091>; this version posted January 18, 2021. The copyright holder for this preprint (which was not certified by peer review) is the author/funder, who has granted bioRxiv a license to display the preprint in perpetuity. It is made available under aCC-BY 4.0 International license.

Figure 2

1 Fig 3.

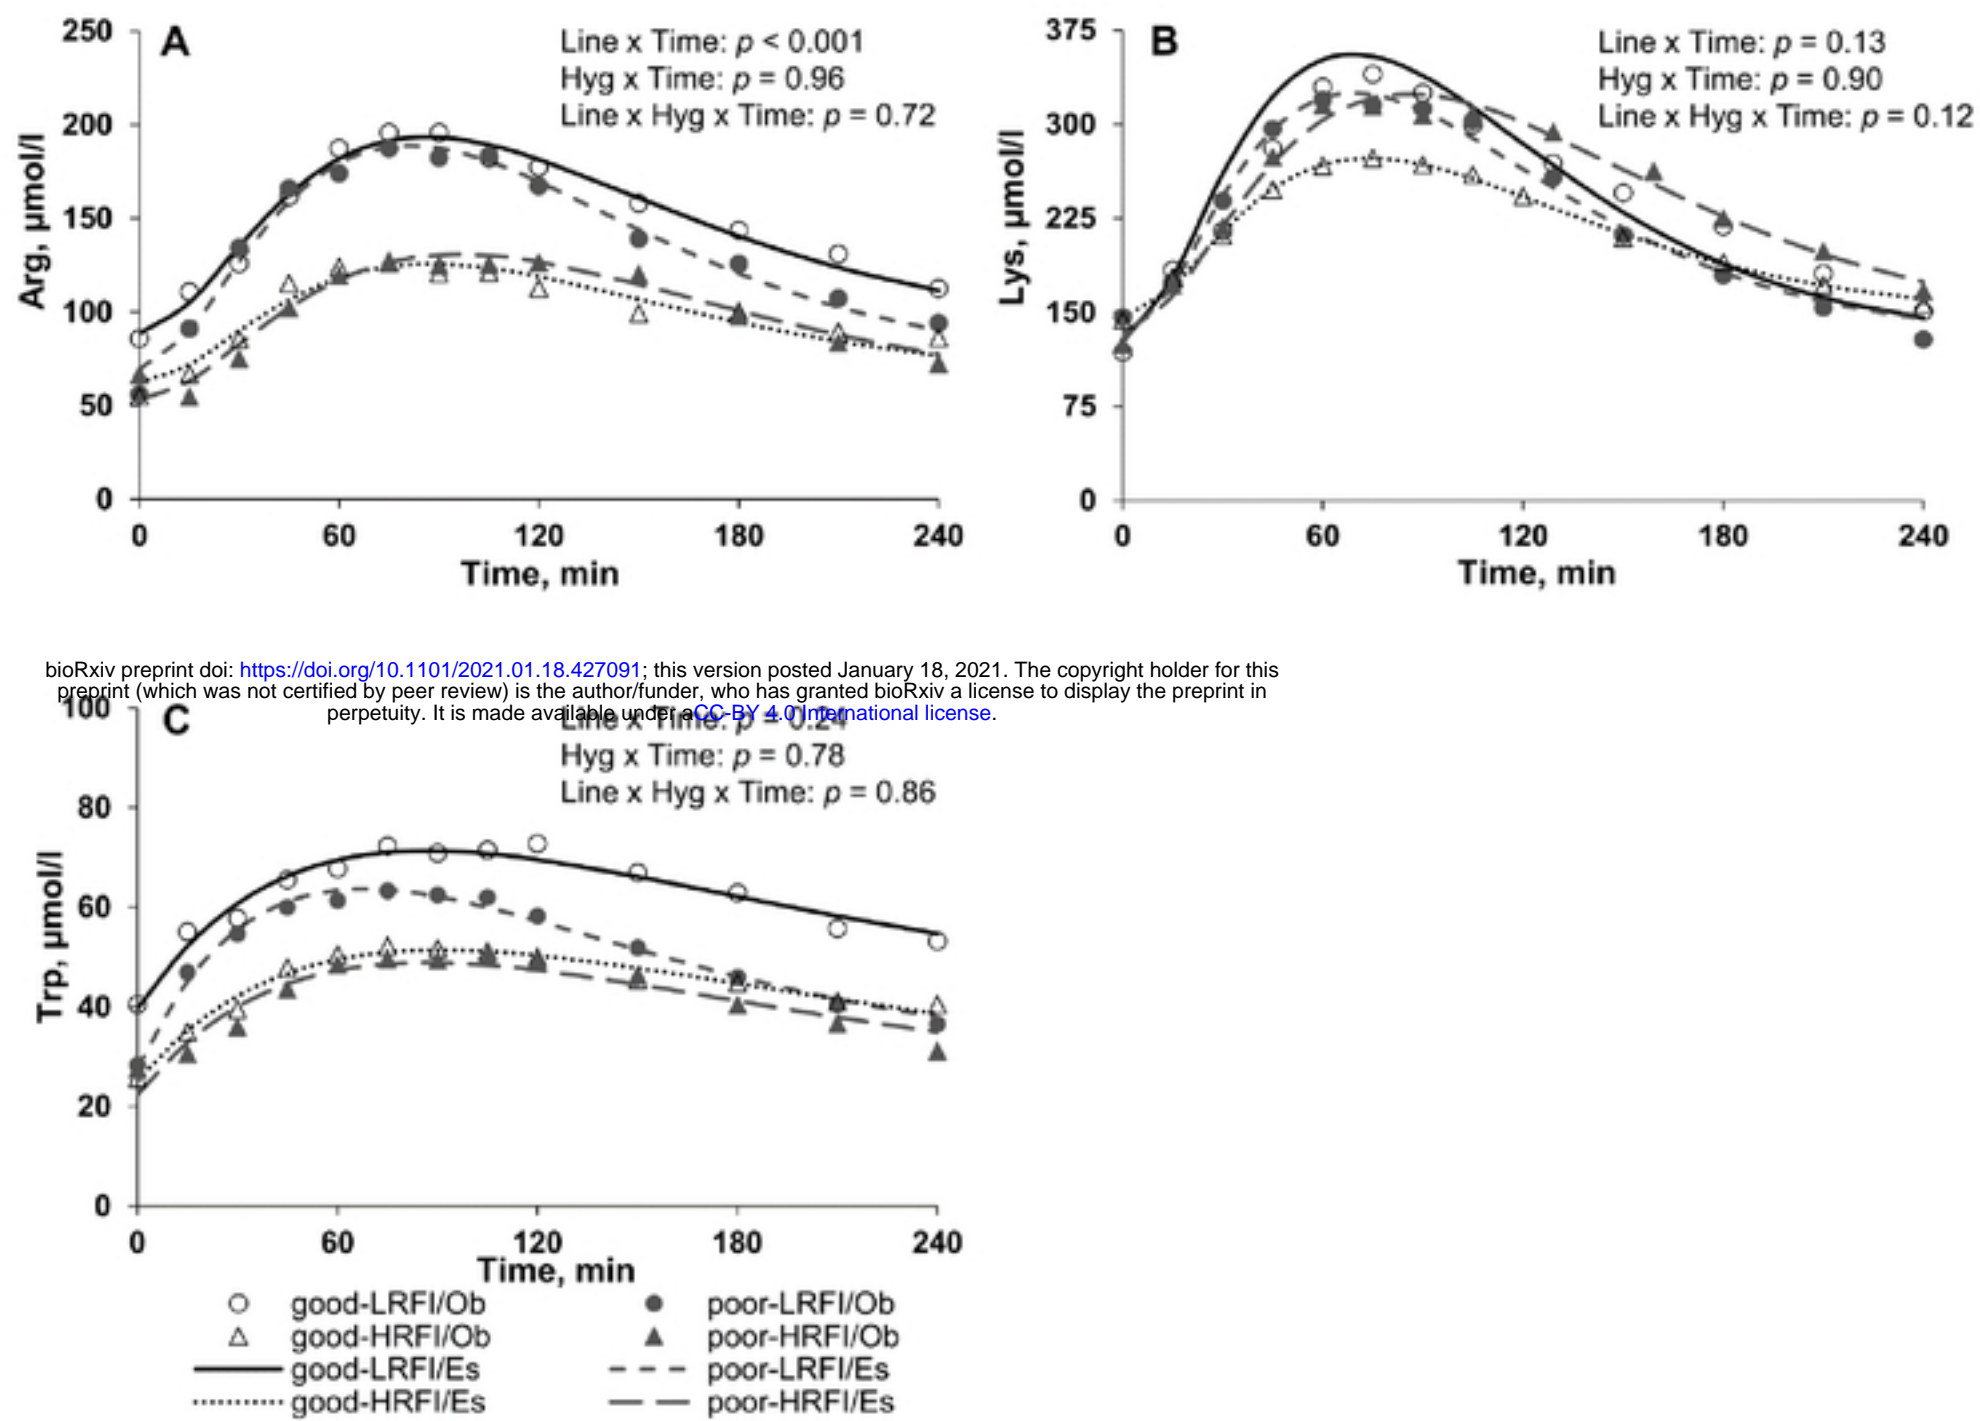

bioRxiv preprint doi: <https://doi.org/10.1101/2021.01.18.427091>; this version posted January 18, 2021. The copyright holder for this preprint (which was not certified by peer review) is the author/funder, who has granted bioRxiv a license to display the preprint in perpetuity. It is made available under aCC-BY 4.0 International license.

Figure 3
